# Supplementary material
Source: PubMed Central journal article supplement (PMC3297993)
Supplement: emboj2011486s1.pdf [file emboj2011486s1.pdf]

| MAPP Name                      | Number Changed | Number Measured | Percent Changed | Z Score | PermuteP | AdjustedP |
|--------------------------------|----------------|-----------------|-----------------|---------|----------|-----------|
| Mm_Striated_muscle_contraction | 5              | 17              | 29.4            | 4.61    | 0        | 0.099     |
| Mm_Nuclear_Receptors           | 4              | 20              | 20.0            | 3.08    | 0.02     | 0.59      |
| Mm_Steroid_Biosynthesis        | 2              | 8               | 25.0            | 2.58    | 0.04     | 0.81      |
| Mm_Gluthation_Metabolism_KEGG  | 3              | 10              | 30.0            | 3.15    | 0.02     | 0.60      |
| Mm_B_Cell_Receptor_NetPath_12  | 8              | 60              | 13.3            | 2.36    | 0.03     | 0.91      |
| Mm_Id_NetPath_5                | 3              | 18              | 16.7            | 2.26    | 0.05     | 0.94      |

**Supplemental Table S1. MAPPFinder results showing the most up- and down-regulated pathways.**

A fold change of 1.5 and a  $p$ -value of  $<0.05$  were used as the criteria for gene expression changes in the *Rp58* KO mouse cortex compared with WT.

Number changed, number of genes changed; Number measured, number of genes measured on the chip; Number on MAPP, number of genes on the MAPP; Percent changed, number changed divided by the number measured. The z-score assumes a hypergeometric distribution. Permute P,  $p$ -value calculated from repeated random sampling trials; Adjusted  $p$ -value,  $p$ -value derived from statistically multiplexed tests.

Supplemental Table S2. List of up- and down-regulated genes identified in Table S1.

| MAPP Name                        | Symbol        | Fp58<br>KO Intensity | WT Intensity | Ratio(KO/WT) | Log2Ratio(KO/WT) | Description                                                                                 | Accession<br>Number |
|----------------------------------|---------------|----------------------|--------------|--------------|------------------|---------------------------------------------------------------------------------------------|---------------------|
| Mm_Striated_muscle_contraction   | Mybpc3        | 103.1447368          | 46.57910043  | 2.214399503  | 1.146915524      | Mus musculus myosin binding protein C, cardiac (Mybpc3), mRNA.                              | NM_008653           |
|                                  | 2300003C06Pik | 113.5                | 58.96943773  | 1.92472583   | 0.944652954      | Mus musculus adult male tongue cDNA, RIKEN full-length enriched library, clone: 2310032K21. | AK009578            |
|                                  | Myh1          | 98.80263158          | 61.4738676   | 1.607229794  | 0.684576214      | Mus musculus 18 days embryo cDNA, RIKEN full-length enriched library, clone:1100001J17.     | AK003182            |
|                                  | Myom1         | 96.81578947          | 64.4066868   | 1.503194688  | 0.588031874      | Mus musculus myomesin 1 (Myom1), mRNA.                                                      | NM_010867           |
|                                  | Tnnc2         | 107.9736842          | 74.55621842  | 1.448218358  | 0.534279144      | Mus musculus troponin C, fast skeletal (Tnnc), mRNA.                                        | NM_009394           |
| Mm_Nuclear_Receptors             | Hnf4a         | 70.39473684          | 39.67544176  | 1.774264727  | 0.827221281      | Mus musculus hepatic nuclear factor 4 (Hnf4), mRNA.                                         | NM_008261           |
|                                  | Nr1h2         | 82.09210526          | 55.24574593  | 1.485944372  | 0.571380108      | 602093563F1 NCI_CGAP_Co24 Mus musculus cDNA clone IMAGE:4208055 5, mRNA sequence.           | BF579673            |
|                                  | Nr4a1         | 100.3815789          | 68.70705653  | 1.461008287  | 0.546964361      | Mus musculus nuclear receptor subfamily 4, group A, member 1 (Nr4a1), mRNA.                 | NM_010444           |
| Mm_Steroid_Biosynthesis          | Nr1d2         | 367.3026316          | 258.5411937  | 1.420673535  | 0.506575067      | Mus musculus orphan nuclear receptor RVR mRNA, complete cds.                                | U12142              |
|                                  | Hsd3b2        | 360.1973684          | 196.5647924  | 1.832461266  | 0.873782704      | Mouse 3-beta-hydroxysteroid dehydrogenase/delta-5-delta-4 isomerase mRNA sequence.          | M75886              |
|                                  | F13b          | 49.94736842          | 32.88711866  | 1.518751732  | 0.602886054      | Mus musculus coagulation factor XIII, beta subunit (F13b), mRNA.                            | NM_031164           |
|                                  | Hcls1         | 29.65131579          | 121.8685236  | 0.243305777  | -2.039157522     | Mus musculus hematopoietic cell specific Lyn substrate 1 (Hcls1), mRNA.                     | NM_008225           |
|                                  | Cd79a         | 57.22368421          | 90.02786352  | 0.63562334   | -0.653755993     | Mus musculus immunoglobulin-associated alpha (Iga), mRNA.                                   | NM_007655           |
| Mm_B_Cell_Receptor_or_NetPath_12 | Fyn           | 83.46052632          | 118.729748   | 0.702945367  | -0.508515528     | Mus musculus Fyn proto-oncogene (Fyn), mRNA.                                                | NM_008054           |
|                                  | Idh1          | 2421.552632          | 5103.731515  | 0.474467088  | -1.075620077     | Mus musculus isocitrate dehydrogenase 1 (NADP+), soluble (Idh1), mRNA.                      | NM_010497           |
|                                  | Dusp6         | 207.3157895          | 430.2676437  | 0.481829839  | -1.053404355     | Mus musculus RIKEN cDNA 1300019103 gene (1300019103Rik), mRNA.                              | NM_026268           |
|                                  | Mapk8         | 150.4868421          | 280.9739652  | 0.535589986  | -0.900799108     | Mus musculus mitogen activated protein kinase 8 (Mapk8), mRNA.                              | NM_016700           |
|                                  | Actr3         | 1074.965003          | 1867.871544  | 0.575502639  | -0.797105551     | Mus musculus actin-related protein 3 (Arp3) mRNA, partial cds.                              | AF307855            |
|                                  | Casp9         | 91.51973684          | 154.5249711  | 0.592265031  | -0.755685187     | Mus musculus caspase 9 (Casp9), mRNA.                                                       | NM_015733           |
|                                  | Gsta2         | 148.8684211          | 240.7712751  | 0.618298096  | -0.693625531     | Mus musculus glutathione S-transferase, alpha 2 (Yc2) (Gsta2), mRNA.                        | NM_008182           |
|                                  | Gstm3         | 201.2631579          | 306.0841701  | 0.657541871  | -0.604845329     | Mouse, glutathione transferase GT9.3 mRNA, 3' end.                                          | J03953              |
|                                  | Arpc1b        | 176.9736842          | 288.8637286  | 0.658228185  | -0.603340291     | Mus musculus actin-related protein complex 1b (Arpc1b) mRNA, complete cds.                  | AF162768            |
|                                  | Id3           | 2376.010569          | 913.5215903  | 2.60093532   | 1.379030523      | Mus musculus inhibitor of DNA binding 3 (Idb3), mRNA.                                       | NM_008321           |
|                                  | MSC           | 156.7697368          | 70.23113392  | 2.232197148  | 1.158464452      | Mus musculus musculin (Msc), mRNA.                                                          | NM_010827           |
|                                  | Id1           | 580.3026316          | 328.9535692  | 1.764086746  | 0.818921505      | Mus musculus transcription factor Id1B (Id1B) mRNA, complete cds.                           | U43884              |

**Supplementary Table S3. Comparison of *lds*- and *ld*-related gene expression profiles in the cortices of *Rp58* KO and control mice.**

| Family Name | Symbol     | <i>Rp58</i> KO Intensity | WT Intensity | Ratio(KO/WT) | Log2Ratio(KO/WT) | Description                                                                                              | Accession Number |
|-------------|------------|--------------------------|--------------|--------------|------------------|----------------------------------------------------------------------------------------------------------|------------------|
|             | <i>ld1</i> | 580.3026316              | 328.9535692  | 1.764086746  | 0.818921505      | Mus musculus transcription factor <i>ld1B</i> ( <i>ld1B</i> ) mRNA, complete cds.                        | U43884           |
| <i>ld</i>   | <i>ld2</i> | 3606.508275              | 3491.986166  | 1.032795694  | 0.04655489       | Mus musculus inhibitor of DNA binding 2 ( <i>ldb2</i> ), mRNA.                                           | NM_010496        |
|             | <i>ld3</i> | 2376.010569              | 913.5215903  | 2.60093532   | 1.379030523      | Mus musculus inhibitor of DNA binding 3 ( <i>ldb3</i> ), mRNA.                                           | NM_008321        |
|             | <i>ld4</i> | 328.75                   | 227.8207364  | 1.443020531  | 0.529091827      | Mus musculus inhibitor of DNA binding 4 ( <i>ldb4</i> ), mRNA.                                           | NM_031166        |
|             | <i>p21</i> | 132.25                   | 92.82867062  | 1.424667607  | 0.510625359      | Mus musculus cyclin-dependent kinase inhibitor 1A ( <i>P21</i> ) ( <i>Cdkn1a</i> ), mRNA.                | NM_007669        |
| Cip/Kip     | <i>p27</i> | 137.8947368              | 113.6385057  | 1.21345081   | 0.279115627      | Mus musculus cyclin-dependent kinase inhibitor 1B ( <i>P27</i> ) ( <i>Cdkn1b</i> ), mRNA.                | NM_009875        |
|             | <i>p57</i> | 1444.163456              | 2386.377196  | 0.605169819  | -0.724588055     | Mus musculus cyclin-dependent kinase inhibitor 1C ( <i>P57</i> ) ( <i>Cdkn1c</i> ), mRNA.                | NM_009876        |
|             | <i>p15</i> | 97.09210526              | 120.7069295  | 0.804362315  | -0.314082603     | Mus musculus cyclin-dependent kinase inhibitor 2B ( <i>p15</i> , inhibits CDK4) ( <i>Cdkn2b</i> ), mRNA. | NM_007670        |
| INK4        | <i>p16</i> | 210.0789474              | 252.8320821  | 0.830903047  | -0.267247948     | Mus musculus strain BALB/cAnPt cyclin dependent kinase inhibitor p16INK4a ( <i>Cdkn2a</i> ) mRNA.        | AFO44335         |
|             | <i>p18</i> | 1165.798749              | 1074.030642  | 1.085442727  | 0.118283605      | Mus musculus cyclin-dependent kinase inhibitor 2C ( <i>p18</i> , inhibits CDK4) ( <i>Cdkn2c</i> ), mRNA. | NM_007671        |
|             | <i>p19</i> | 893.8401639              | 1008.563786  | 0.886250504  | -0.174213551     | Mus musculus cyclin-dependent kinase inhibitor 2D ( <i>p19</i> , inhibits CDK4) ( <i>Cdkn2d</i> ), mRNA. | NM_009878        |

## Supplementary Figure S1.

\*

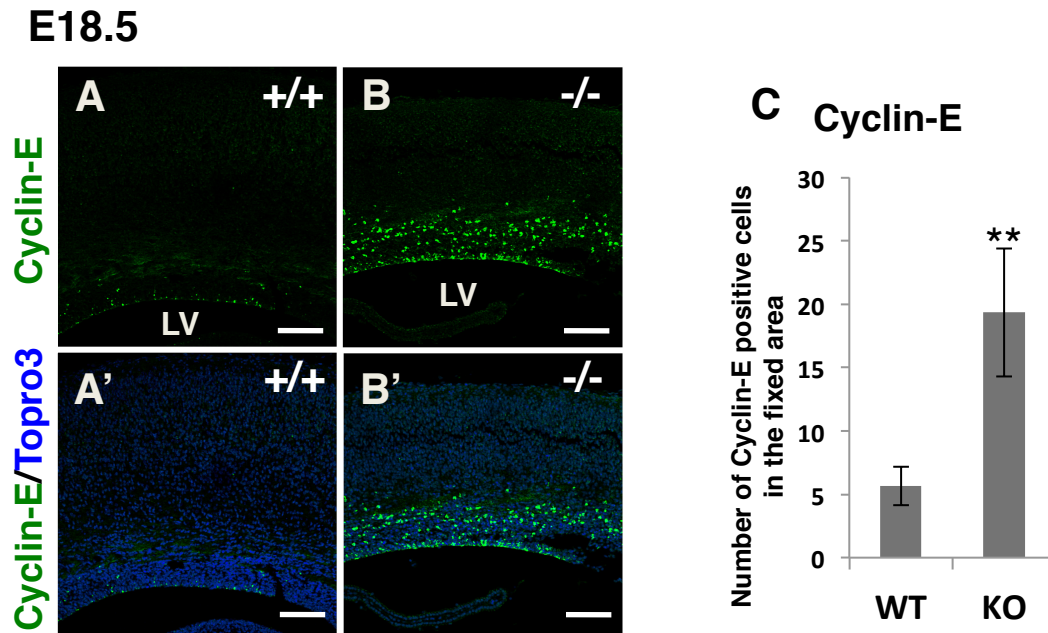

**Figure S1. *Rp58* KO cortex showing cell cycle re-entry, even during late gestation.** (A-B') Coronal sections of WT and mutant cortex were stained with anti-cyclin-E (green) and Topro3 (blue, nuclear stain). Scale bars: 100  $\mu$ m. LV: lateral ventricle. (C) The number of cyclin-E positive cells in the fixed area was measured ( $n=3$ ).

## Supplementary Figure S2.

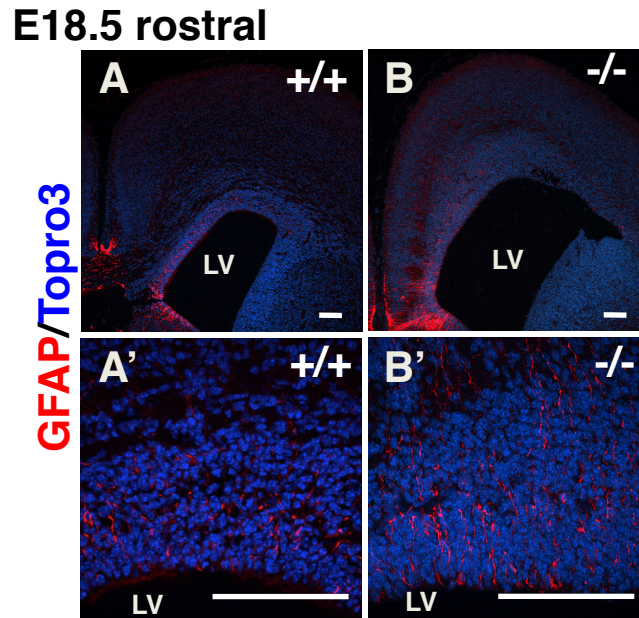

**Figure S2. The number of GFAP-positive astrocytes was not clearly increased in the *Rp58* KO rostral cortex compared with the control cortex.**

(A-B') Representative images showing staining of coronal sections from WT and mutant mice for GFAP. (A') and (B') represent magnified images from (A) and (B), respectively. Nuclei were stained with Topro3. Scale bars: 0.1 mm. LV: lateral ventricle ( $n=3$ ).

## Supplementary Figure S3.

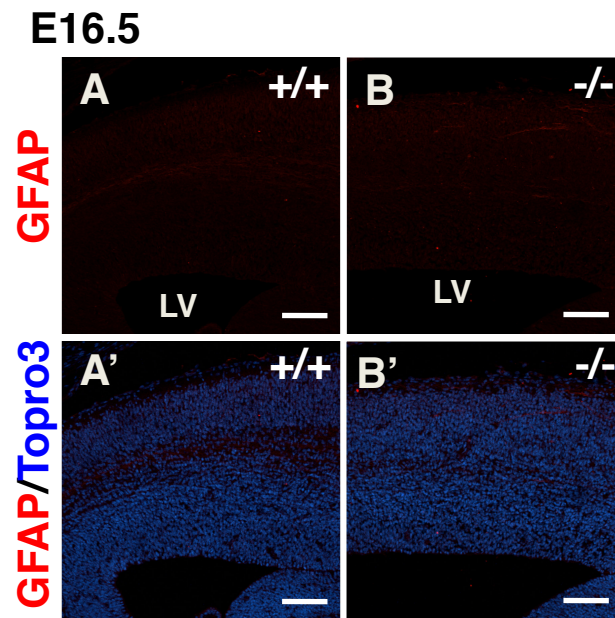

**Figure S3. Astrocytes were not yet present in the E16.5 RP58 mutant or control cortex.** (A-B') Representative immunohistochemical staining of coronal sections for GFAP. Nuclei were stained with Topro3. (A') and (B') are merged image of GFAP and Topro3. Scale bars: 0.1 mm. LV: lateral ventricle. ( $n=3$ ).

## Supplementary Figure S4.

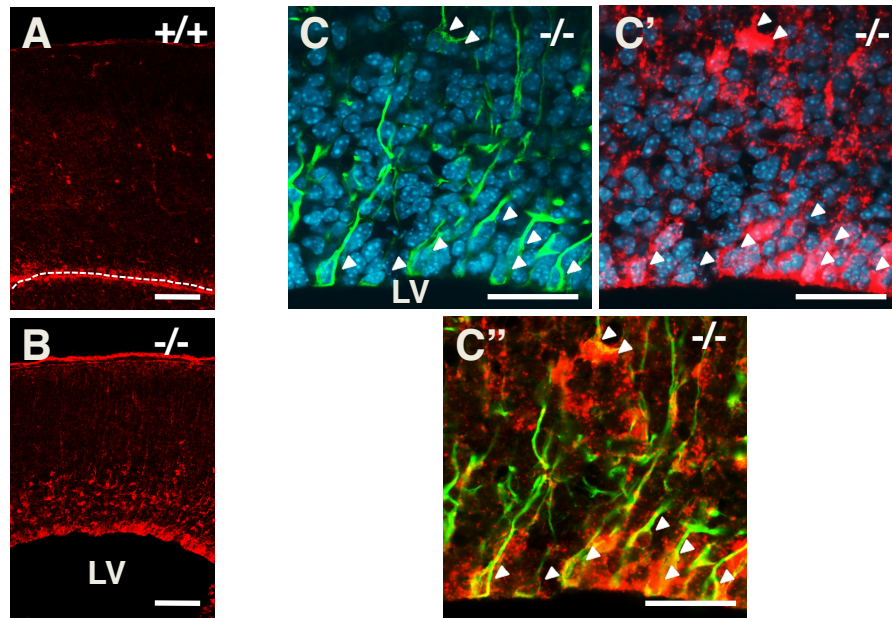

**Figure S4. *Rp58* KO mice show incremental increases in S100 $\beta$ -positive astrocytes.** (A,B) Representative images showing staining for S100 $\beta$  in caudal sections from E18.5 WT (A) and mutant mice (B). The number of S100 $\beta$ -positive astrocytes was increased in *Rp58* KO mice. (C-C'') Double immunostaining for S100 $\beta$  and GFAP in the mutant mice. (C) shows merged images of GFAP and nuclear staining (DAPI). C' shows merged images of S100 $\beta$  and nuclear staining (DAPI). C'' shows merged images of S100 $\beta$  and GFAP. Double-positive cells are indicated by arrowheads. Scale bars: 100  $\mu$ m (A,B), 50  $\mu$ m (C-C''). LV: lateral ventricle. The dotted line in (A) indicates the edge of the VZ ( $n=3$ ).

## Supplementary Figure S5.

Red font; E-box, ( ); cloning region  
Mouse; Ms, Human;Hu

*Id1* (+1189 ~ +1400)

Ms; ca**cagctg**gt----ca**catctg**gg

Hu; ca**cagctg**gt----ta**catctg**ga

*Id2* ( -2576 ~ -2966)

Ms; ca**catctg**g----ctca**cagctg**tg

Hu; ca**catctg**g----ctca**cagctg**tg

*Id3* (-3318 ~ -3028)

Ms; ca**cagctg**tggg----cccca**cagctg**gg

Hu; ca**cagctg**tggg----cccca**cagctg**gg

*Id4* (+23271 ~ +23551)

Ms; ca**cagctg**ta----ca**cagctg**tg

Hu; ca**cagctg**ta----ca**cagctg**tg

Figure S5. Location and putative RP58-binding sequence in each *Id* genomic region (conserved between mouse and human).

Red font indicates E-box sequences (CANNTG).



Supplementary Figure S6.

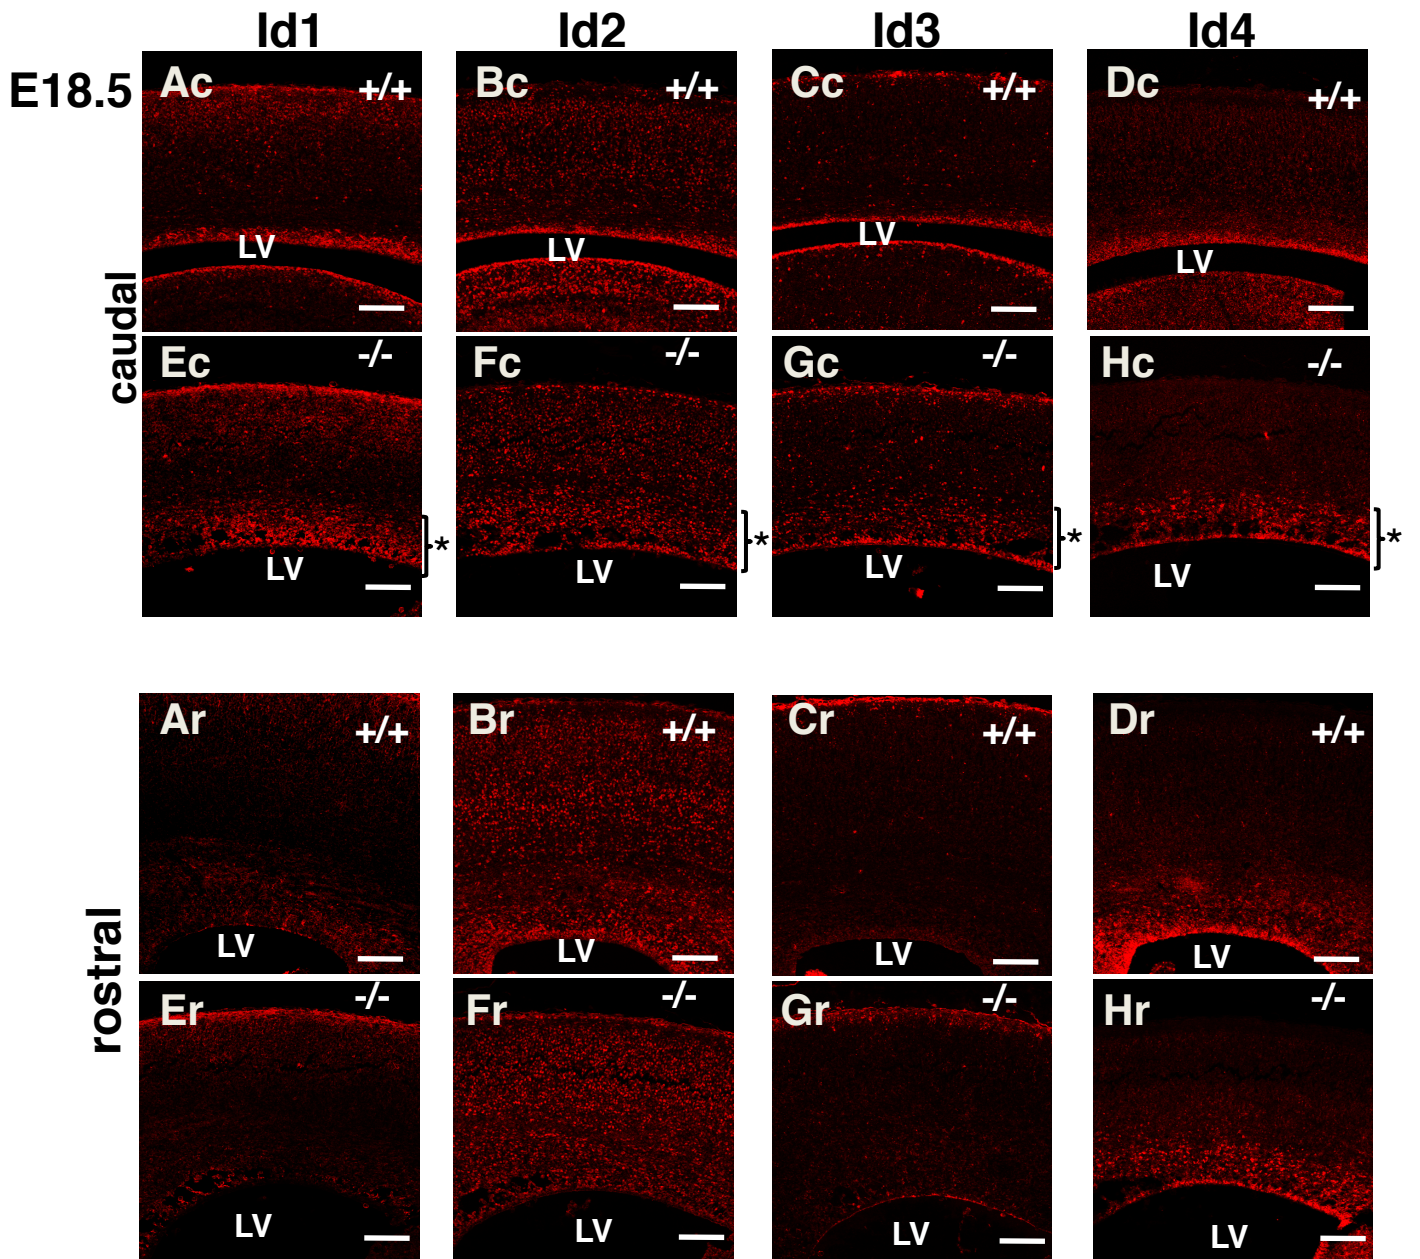

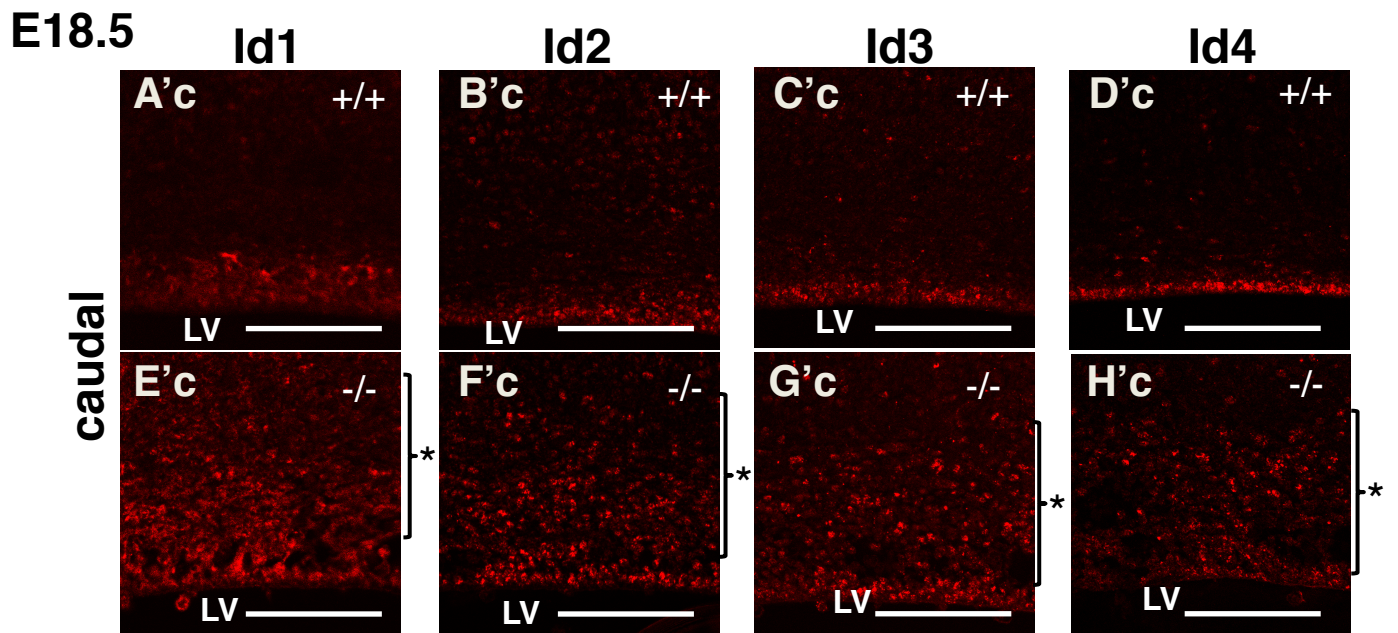

**Figure S6. *Rp58* KO mice show ectopic expression of Id proteins in the cerebral cortex.** (A'c-H'c, Ar-Hr) Representative images showing Id1, Id2, Id3, and Id4 in caudal sections (A'c-H'c) and rostral sections (Ar-Hr) from E18.5 WT and mutant mice. (A'c-H'c) represent magnifications of (A'c-H'c), respectively. The stars indicate the regions in which all Id proteins were ectopically expressed in the mutant cerebral cortex around the VZ/SVZ (E'c-H'c, E'c-H'c) (star). Scale bars: 100 μm. LV: lateral ventricle ( $n=3$ ).

## Supplementary Figure S7.

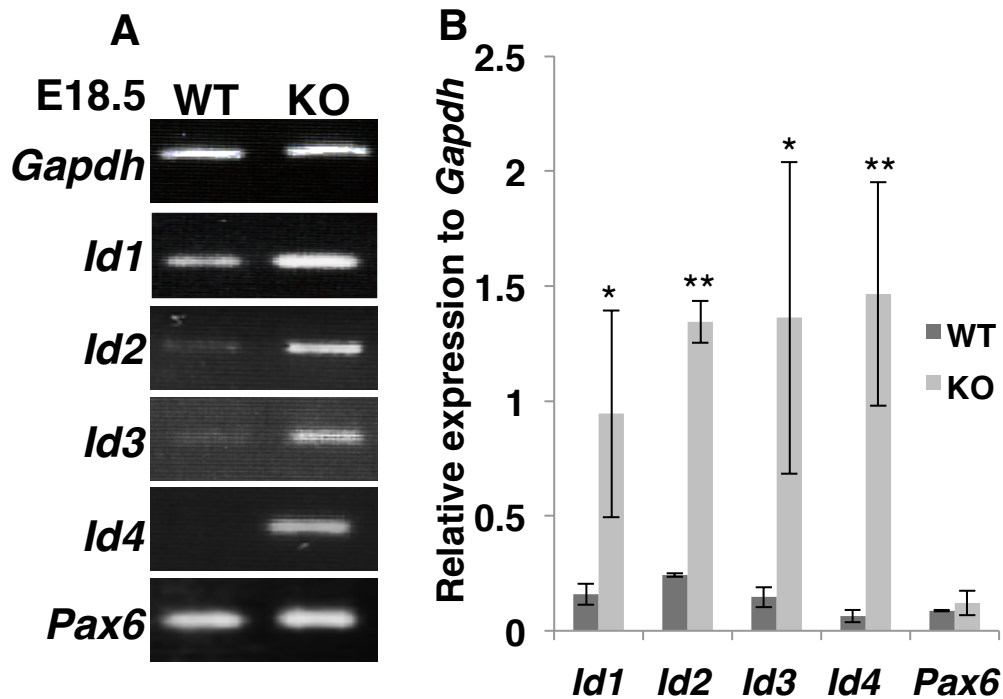

**Figure S7. Expression of *Id1-Id4* mRNAs was upregulated at each neurosphere level in *Rp58* KO mice.**

(A) Reverse transcription (RT)-PCR shows the expression levels of endogenous *Id* and *Gapdh* (internal control) mRNAs. (B) Semi-quantification of the presented agarose gel image (A) was performed using Fiji software. *Pax6* mRNA was used as a negative control. *t*-test: (\*)  $P < 0.05$ , (\*\*)  $P < 0.01$ . Error bars represent mean  $\pm$  SD,  $n = 5$ .

## Supplementary Figure S8.

**+FGF**

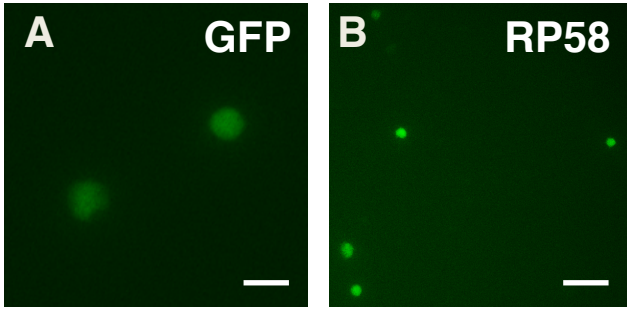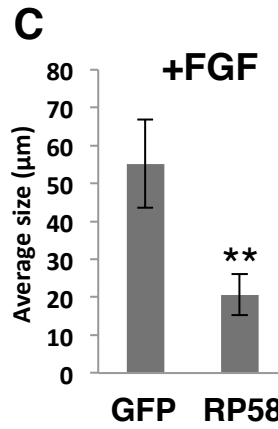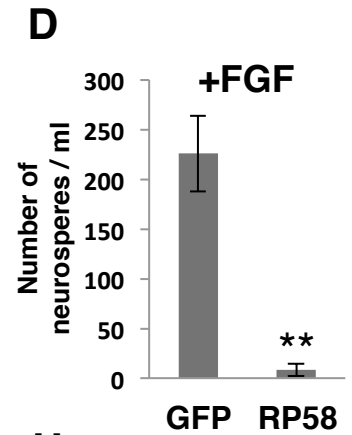

**+EGF/FGF**

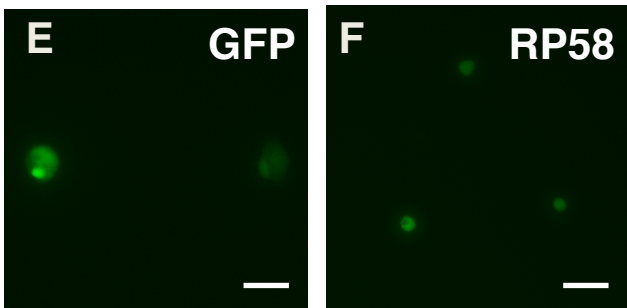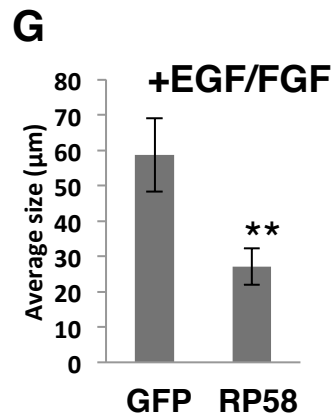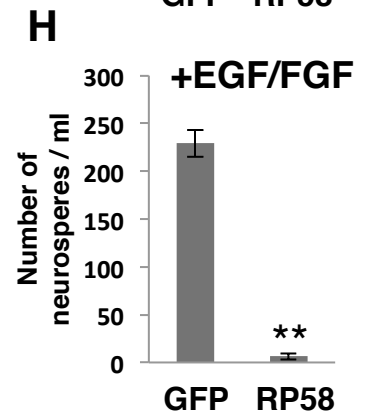

### Figure S8. RP58 reduces the self-renewal capacity of neurospheres under FGF2- or EGF- and FGF2-supplemented conditions.

(A, B, E, F) Representative images of GFP- expressing neurospheres isolated from the E14.5 cortex and cultured for 7 days in the presence of FGF2 (A, B) or EGF and FGF2 (E, F). (C, G) The average diameter under the conditions in (A, B) or (E, F). (D, H) The number of neurospheres was counted after replating primary neurosphere cells of (A, B) or (E, F) at  $0.5 \times 10^5$  cells/ml. (C, D, G, H) Three independent experiments were performed. (\*\* $P < 0.01$ ;  $t$ -test). Error bars indicate the SD. Scale bars: 100  $\mu$ m.

## Supplementary Figure S9.

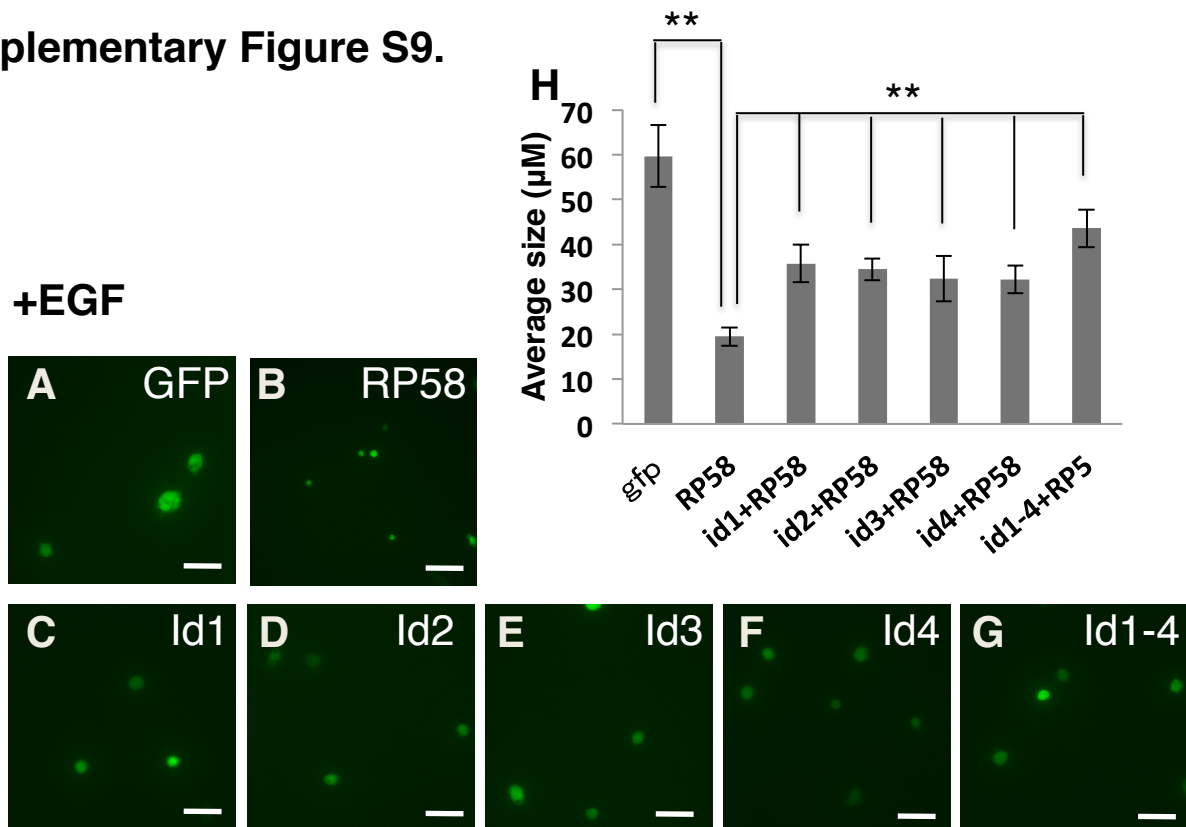

**Figure S9. Co-induction of Ids along with Rp58 partially rescued the size of the neurospheres.**

(**A-G**) Representative images showing GFP-expressing neurospheres isolated from the E14.5 cortex and cultured for 7 days in the presence of EGF. (**B**) shows Rp58-induced spheres, and (**C-G**) show Id- and Rp58-induced spheres. Three experiments were performed for each of the four embryos. (**H**) Quantification of the average of the diameter under the condition in (**A-G**). (\*\* $P < 0.01$ ;  $t$ -test). Error bars indicate the SD. Scale bars: 100  $\mu\text{m}$ .

## Supplementary Figure S10.

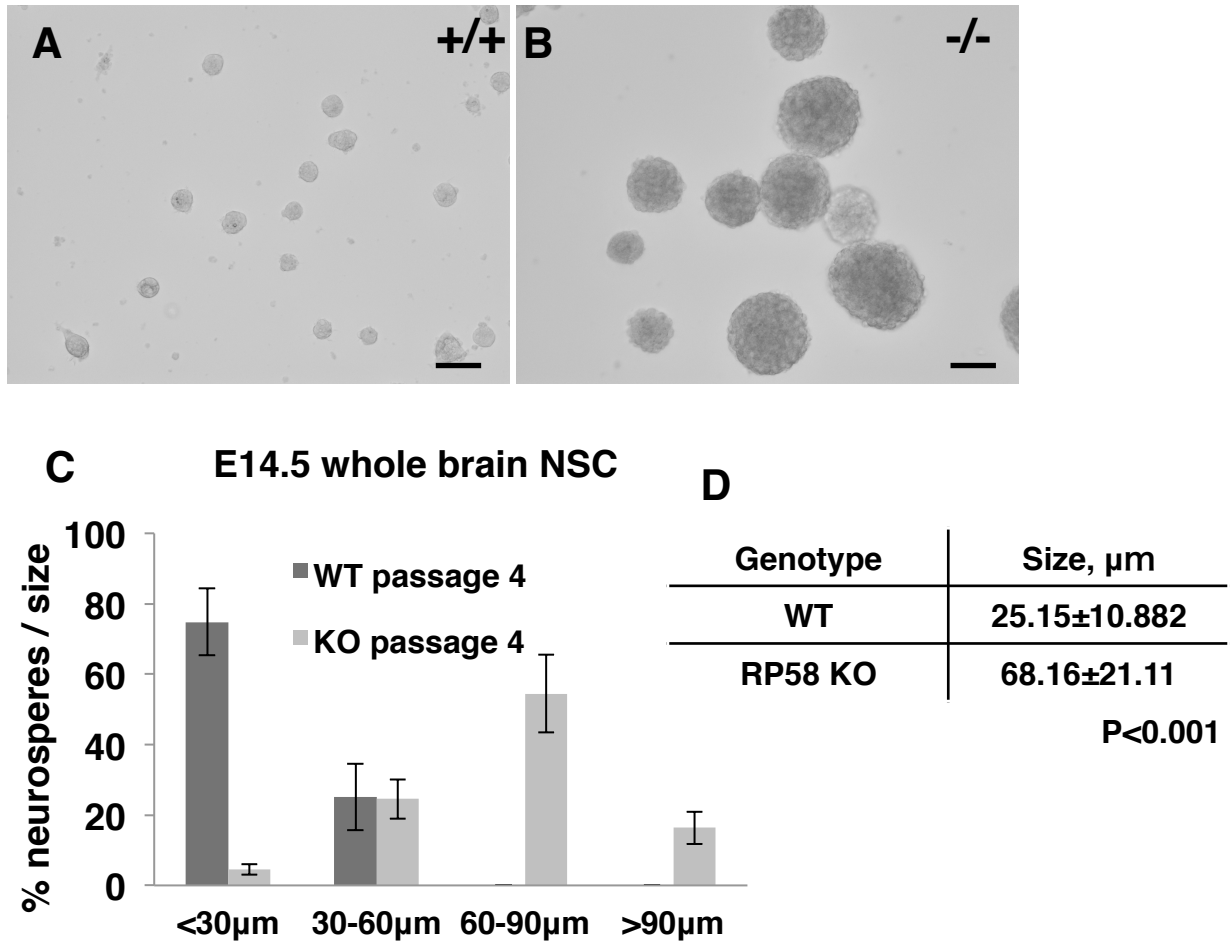

### Figure S10. Self-renewal potential of NSCs from the Rp58 KO cortex.

(A, B) Neurospheres from E14.5 at passage 4. Representative images showing neurospheres from WT and KO E14.5 cortex cultures. (C) Size distribution of E14.5 neurospheres after four passages. Scale bars: 50  $\mu$ m ( $n=3$ ). Rp58 KO spheres were much larger than wild-type spheres as shown by a shift to the right in the size distribution plot. (D) The average diameter of >200 neurospheres per genotype. The Rp58 KO neurospheres were also roughly 2.7-fold larger in volume (\*\* $P < 0.01$ ;  $t$ -test), indicating enhanced self-renewal.

## Supplementary Figure S11.

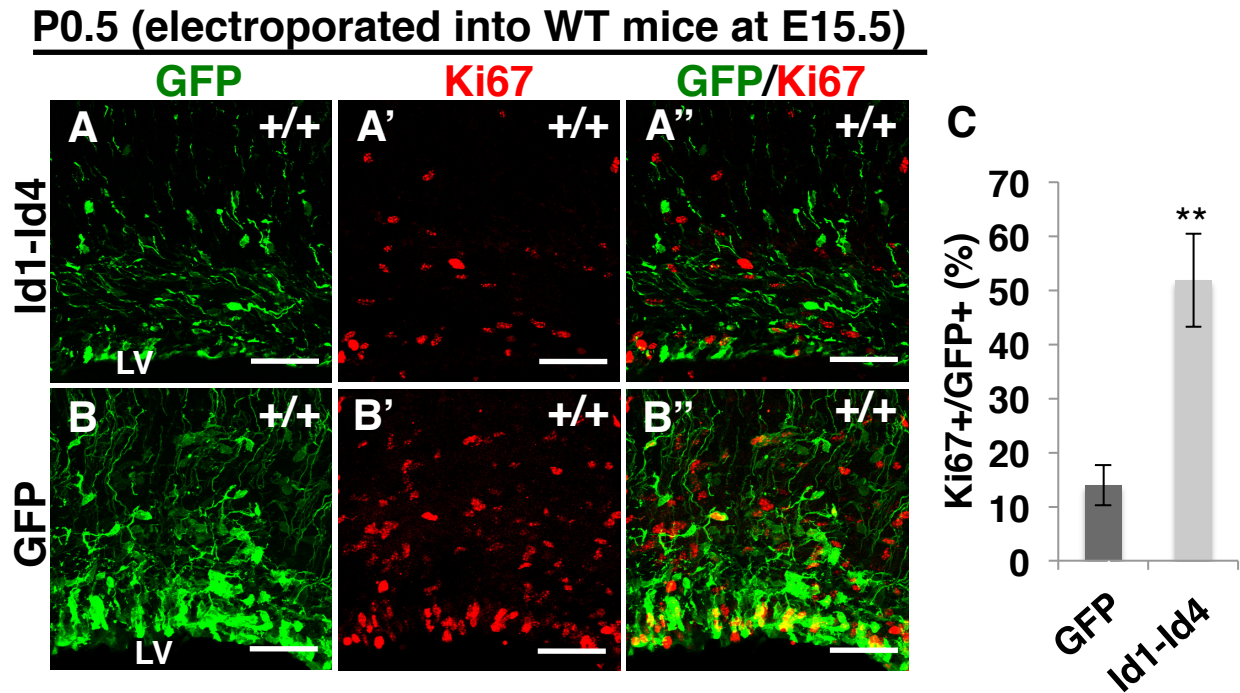

**Figure S11. *Id* overexpression mimicked the *Rp58* KO mouse phenotype of increased proliferating cells.**

(**A**, **B**, **A''**, **B''**) Representative images of WT brains electroporated at E15.5 with *GFP* expression vector (**A-A''**) or co-electroporated with *GFP*, *Id1*, *Id2*, *Id3*, and *Id4* expression vectors (**B-B''**) were fixed at P0.5 and stained with anti-*GFP* (green) (**A**, **B**, **A''**, **B''**) and anti-Ki67 (red) (**A'**, **B'**, **A''**, **B''**) at P0.5. (**C**) Quantification of the ratio of Ki67-positive cells to GFP-positive cells in (**A''**) and (**B''**). Scale bars: 50  $\mu$ m (**A-B''**). *t*-test: (\*\*)  $P < 0.01$ . Error bars represent mean  $\pm$  SD,  $n = 4$ . LV; lateral ventricle.

## Supplementary Figure S12.

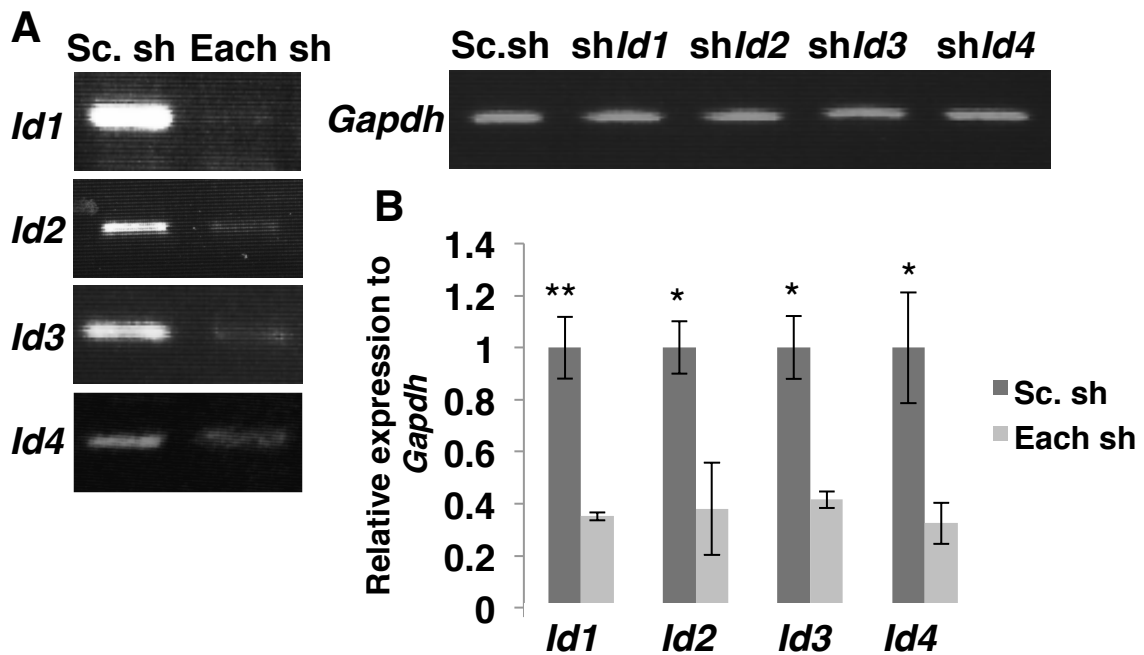

### Figure S12. Downregulatory effect of *sh/d* expression in mouse NSC-derived neurospheres.

(A) RT-PCR analysis showed that the dissociated cells from E14.5 WT cerebral cortex transduced with either GFP-IRES-scramble shRNA (Sc. sh) lentivirus or *shld1*, *ld2*, *ld3* and *ld4*-IRES-GFP (*shld1-ld4*) lentivirus produced neurospheres, which were harvested after 4 days. (B) Semi-quantification of the presented agarose gel image (A) was performed using Fiji software. *t*-test: (\*)  $P < 0.05$ , (\*\*)  $P < 0.01$ . Error bars indicate mean  $\pm$  SD,  $n = 3$ .



## Supplementary Figure S13.

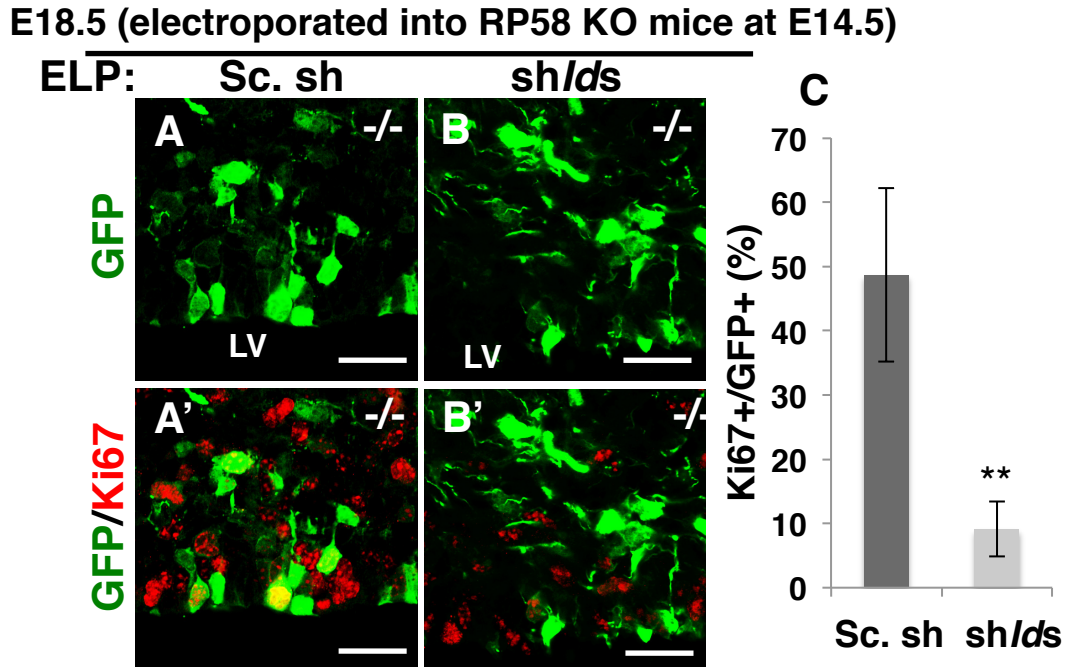

**Figure S13. *Id1-Id4* knockdown rescued the increase of proliferating cells in *Rp58* KO mice.**

(**A-B'**) *Rp58* KO cortex electroporated at E14.5 with control scramble shRNA (Sc. sh) expression vector (**A, A'**) or co-electroporated with *shld1*, *shld2*, *shld3*, and *shld4* expression vectors (**B, B'**) was fixed at E18.5 and stained with anti-GFP (green) and anti-Ki67 (red) antibodies. (**C**) Quantification of the ratio of Ki67-positive cells to GFP-positive cells in (**A'**) and (**B'**). Scale bars: 25  $\mu$ m (**A-B'**). *t*-test: (\*\*) $P < 0.01$ . Error bars indicate mean  $\pm$  SD,  $n = 3$ . LV; lateral ventricle.

## Supplementary Figure S14.

E18.5 (electroporated at E14.5)

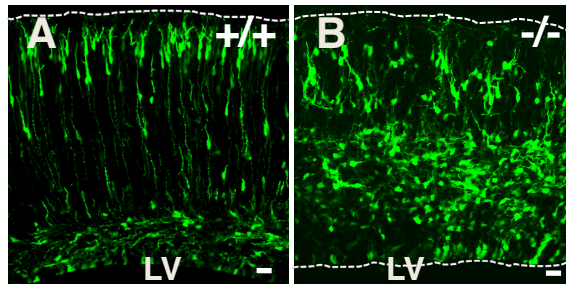

**Figure S14. Comparison of the migration pattern in WT and *Rp58* KO cortex.** (A, B) Representative image of *Rp58* KO cortex electroporated at E14.5 with GFP expression vector was fixed at E18.5 and stained with anti-GFP (green). Scale bars: 25  $\mu$ m (A, B). The dotted lines indicate the edge of the neocortical VZ or cortical plate. LV; lateral ventricle.

## Supplementary Figure S15.

E18.5  
(electroporated into KO mice at E14.5)

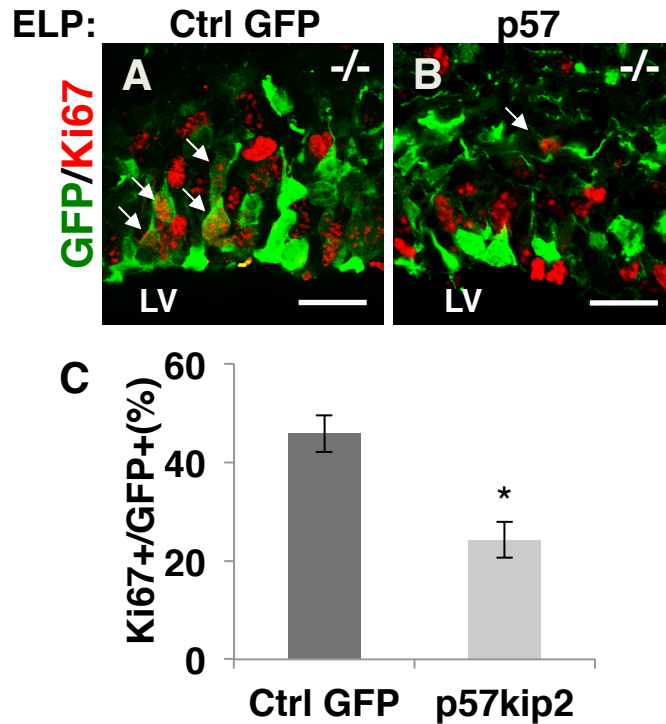

**Figure S15. *p57* overexpression rescued the increase of proliferating cells in *Rp58* KO mice.**

(**A-B**) Representative image of *Rp58* KO cortex electroporated at E14.5 with control *GFP* expression vector (**A**) or co-electroporated with *p57* expression vectors (**B**) was fixed at E18.5 and stained with anti-GFP (green) and anti-Ki67 (red) antibodies. (**C**) Quantification of the ratio of Ki67-positive cells to GFP-positive cells in (**A**) and (**B**). Scale bars: 25  $\mu$ m (**A**, **B**). *t*-test: (\*)  $P < 0.05$ . Error bars indicate mean  $\pm$  SD,  $n = 3$ . The arrows indicate the double-stained cells.

Supplementary Figure S16.

**P5.5 (electroporated into WT mice at E15.5)**

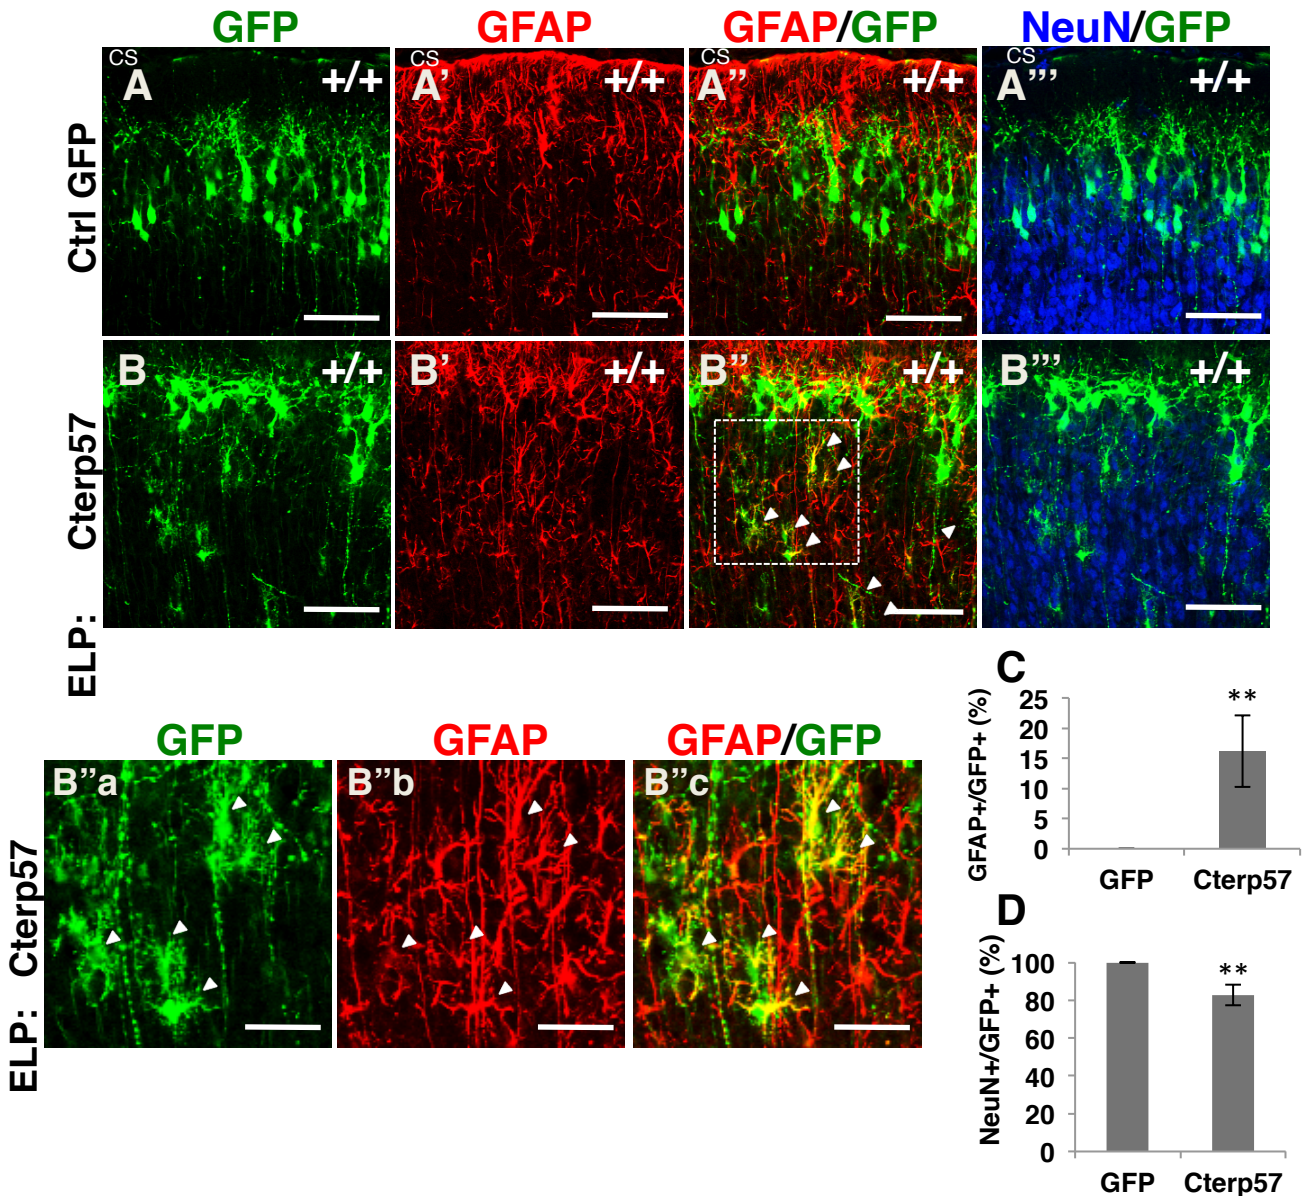

**Figure S16. Functional inhibition of p57 protein mimics the Rp58 KO mouse phenotype.** (A-B''c) Representative fluorescence images of coronal sections through cortices electroporated with control GFP or Cterp57 at E15.5 and analyzed after 9 days. Sections were double-labeled for GFP, GFAP and NeuN. (B''a-B''c) Magnification of the dotted square in (B''). (C and D) Percentage of EGFP or NeuN-positive cells within the cortical mantle. GFAP and GFP double-positive cells indicated by arrowheads (B'', B''a-B''c) ( $n=3$ ). \* $P<0.05$ , \*\* $P<0.01$ . Error bars indicate  $\pm$  SD. Scale bars: 100  $\mu$ m (A-B'''), 50  $\mu$ m (B''a-B''c). CS; cortical surface.

## Supplementary Figure S17.

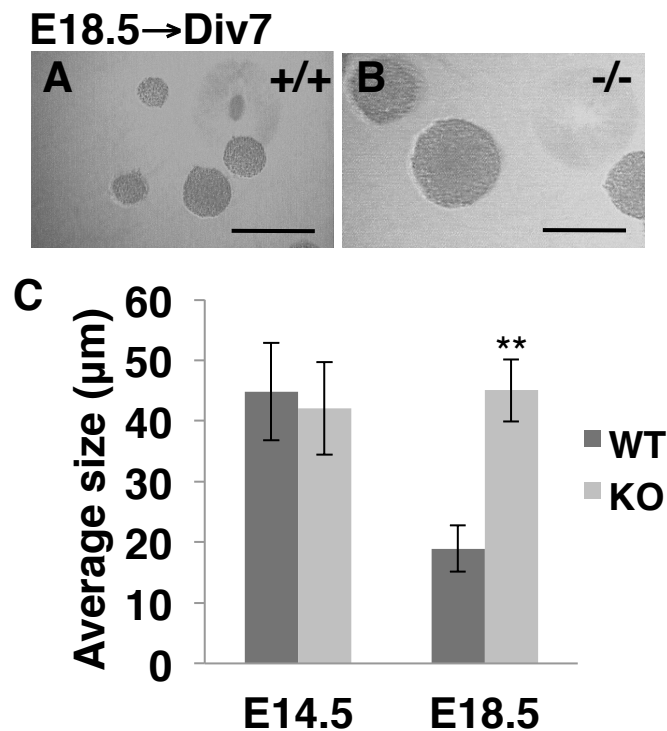

**Figure S17. Progenitors from the E18.5 cortex maintain proliferative competency to the same extent as those from E14.5 in *Rp58* KO mice.**

(**A**, **B**) Representative images showing neurospheres harvested from E18.5 cortex of WT (**A**) or *Rp58* KO mice (**B**). The neurospheres were harvested from E14.5 or E18.5 after 7 days. Scale bars: 50  $\mu\text{m}$ . (**C**) Quantitative analysis of neurosphere diameter. (\*\* $P < 0.01$ ; *t*-test). Error bars indicate SD ( $n=20$ ).

Supplementary Figure S18.

P0.5 (electroporated into WT mice at E15.5)

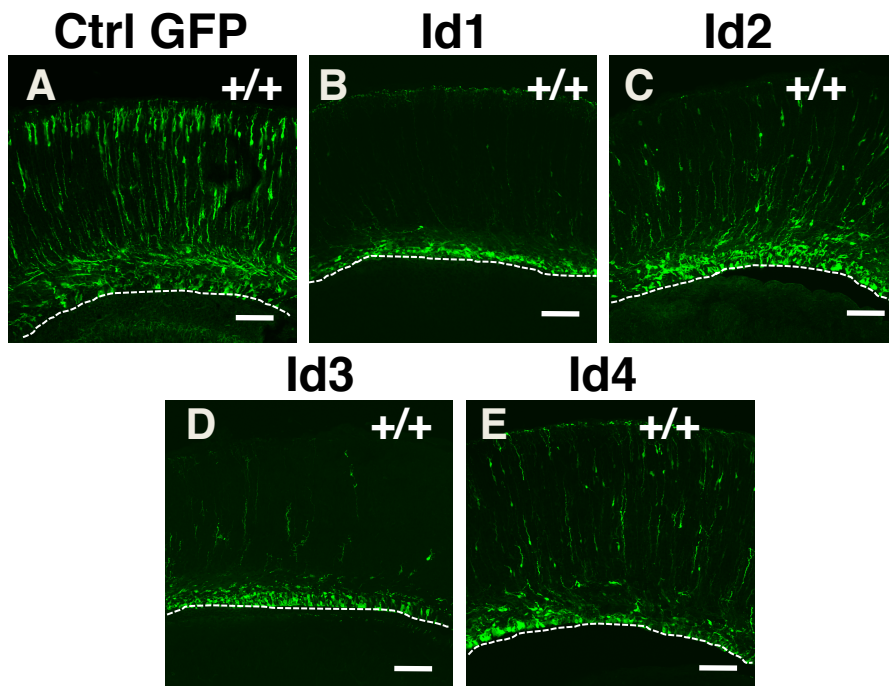

P0.5 (electroporated into WT mice at E15.5)

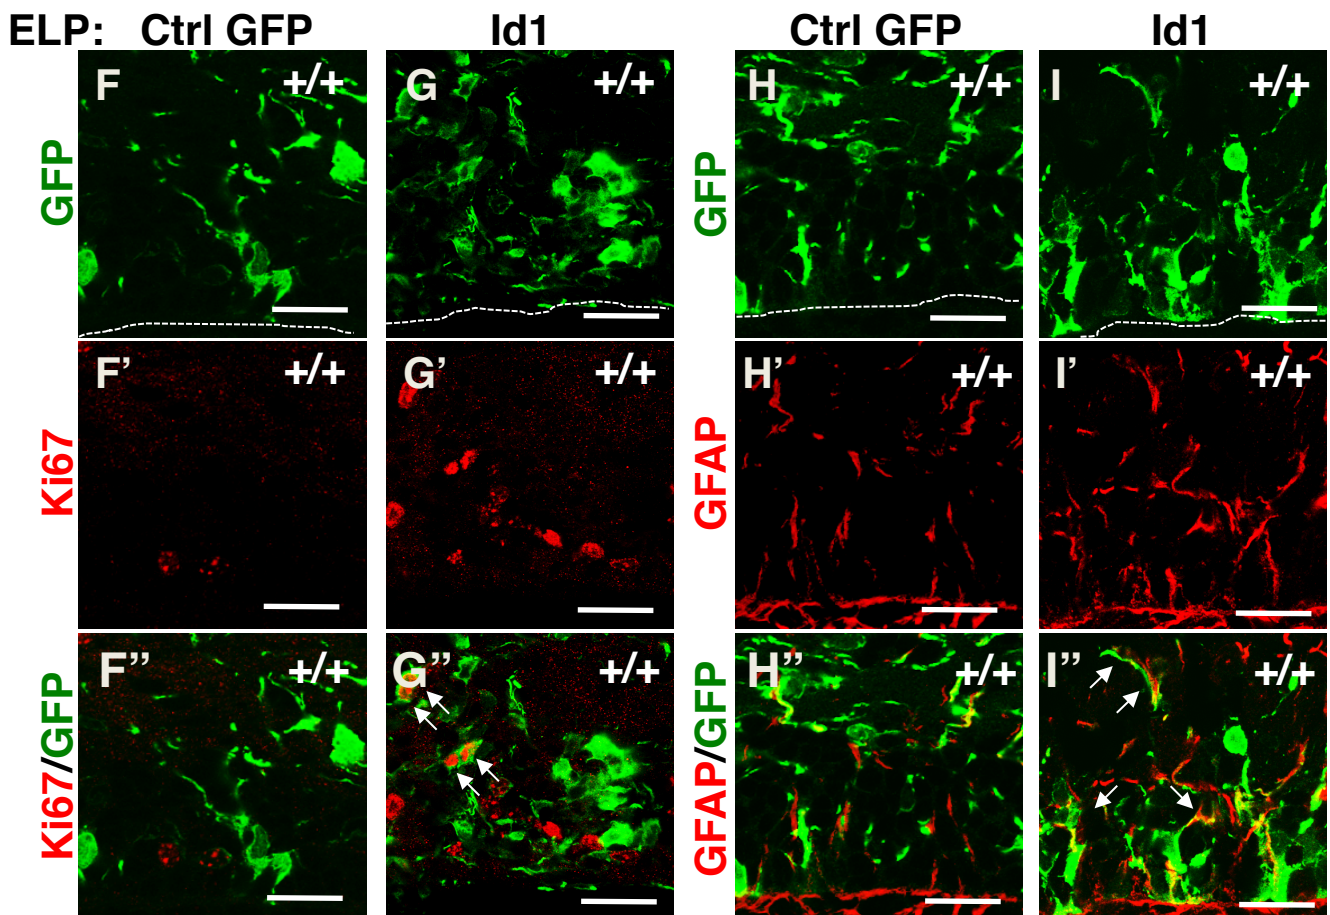

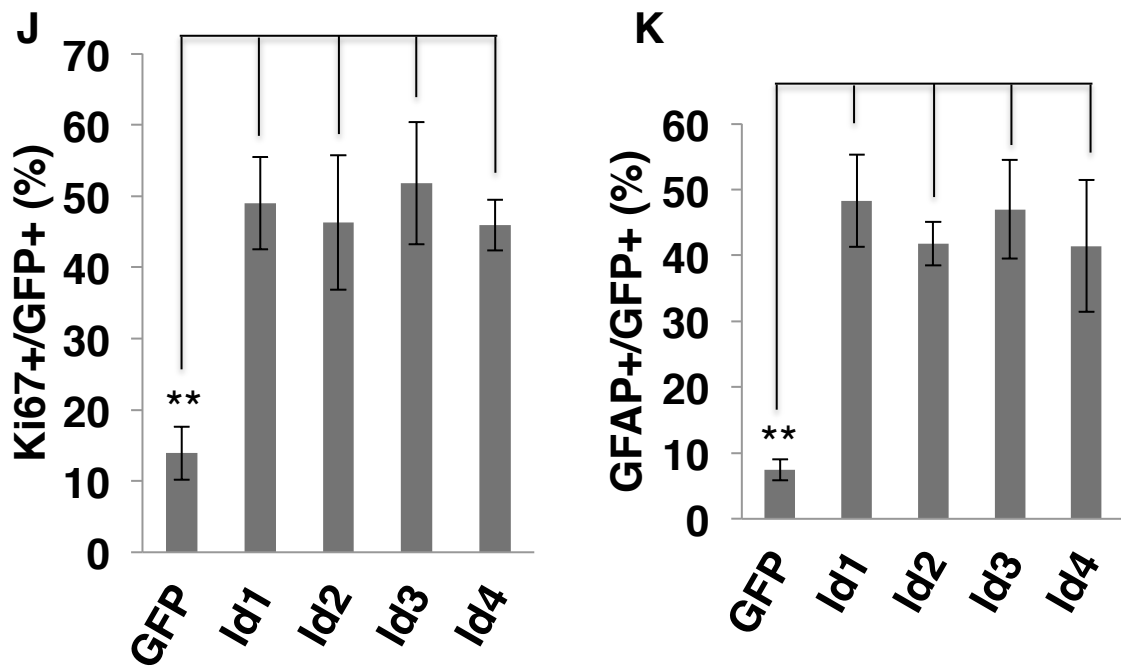

**Figure S18. Expression of each Id *in vivo* impacts on the progenitor/astrocyte compartments.**

(A-K) E15.5 WT cortices were electroporated with control GFP or with each Id, and GFP overexpression was analyzed 4 days later. (A-E) Representative images showing labeling of the GFP signal in coronal cortical sections ( $n=3$ ). (F-I'') Representative magnified images of the VZ/SVZ regions from A. (J,K) Quantification of Ki67<sup>+</sup>/GFP<sup>+</sup> cells or GFAP<sup>+</sup>/GFP<sup>+</sup> cells within the VZ/SVZ. Scale bars: 100  $\mu$ m (A-E), 25  $\mu$ m (F-I''). (\*\* $P < 0.01$ ;  $t$ -test). Data represent the mean  $\pm$  SD ( $n=3$ ). The dotted lines indicate the edge of the neocortical VZ or cortical plate.

## Supplementary Figure S19.

### E18.5 (electroporated into RP58 KO mice at E14.5)

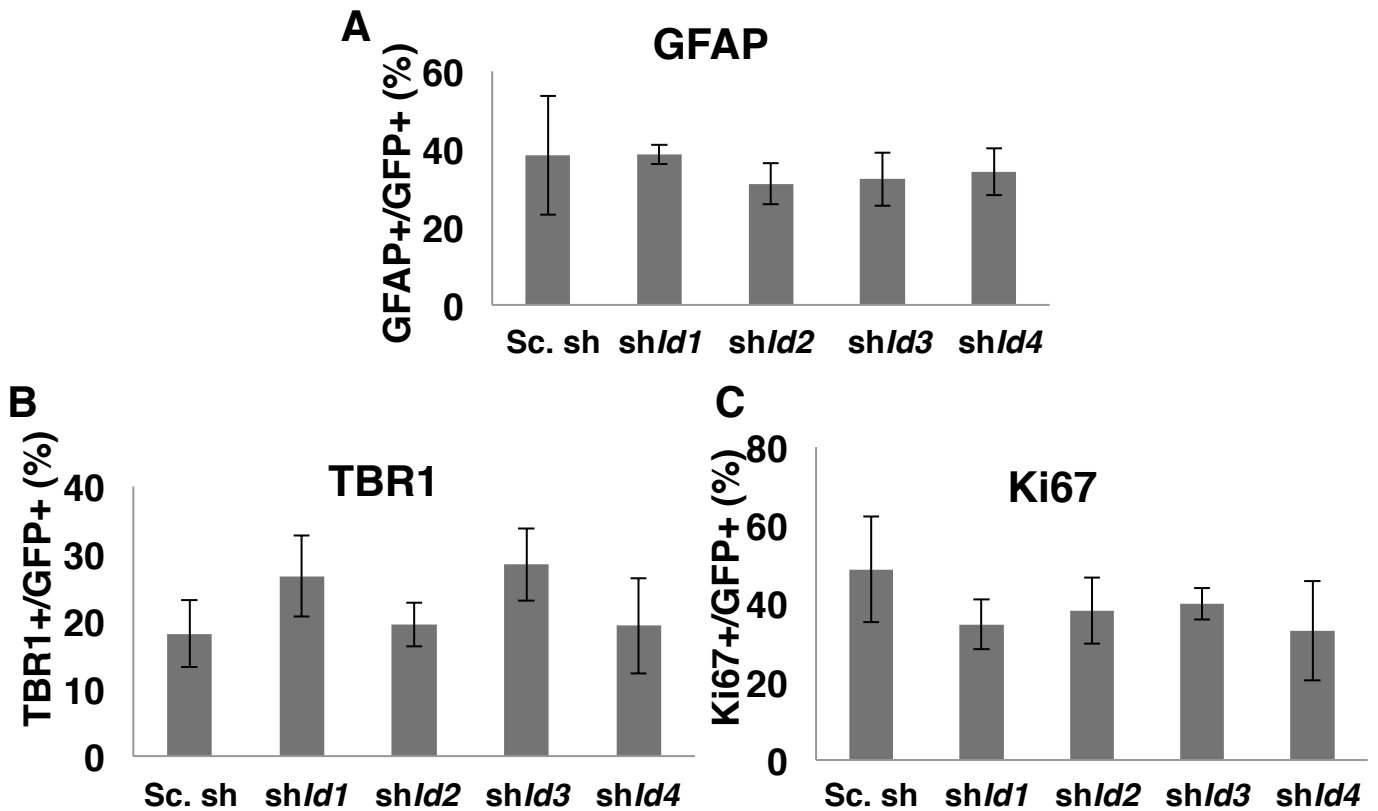

#### **Figure S19. Knockdown of each *Id* gene could not rescue the *Rp58* KO phenotype.**

(A-C) *Rp58* KO cortex electroporated at E14.5 with control scramble (Sc) shRNA, *shld1*, *shld2*, *shld3*, or *shld4* was fixed at E18.5 and stained with anti-GFP and anti-GFAP, anti-Tbr1 or anti-Ki67. Quantification of the ratio of GFAP-positive cells to GFP-positive cells (A), the ratio of Tbr1-positive cells to GFP-positive cells in (B) and the ratio of Ki67-positive cells to GFP-positive cells in (C). Error bars indicate SD,  $n = 3$ .



## Supplementary Figure S20.

Table S4. Colony formation of *Rp58* KO mouse derived progenitors.

| Group                         | No. of Colonies per field (×40) |
|-------------------------------|---------------------------------|
|                               | Mean ± SD                       |
| Hela cells (positive control) | 15.3 ± 2.8                      |
| WT                            | 0**                             |
| <i>Rp58</i> KO                | 0**                             |

\*\*P < 0.01, compared to the positive control (Hela cells).

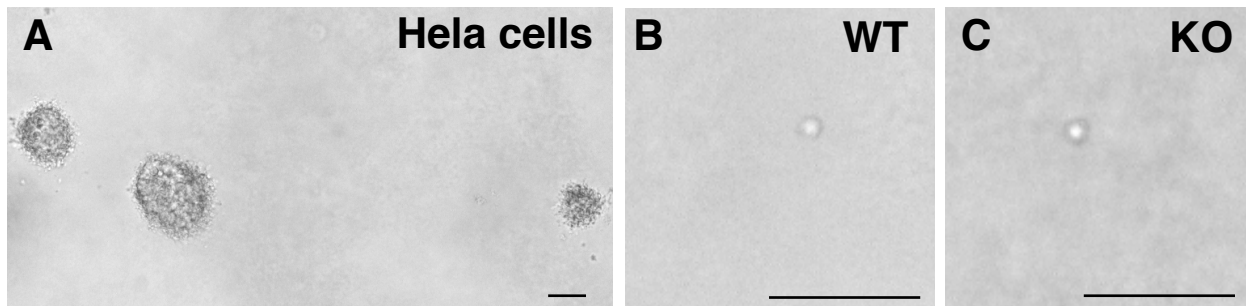

**Figure S20. Progenitor cells from the *Rp58* KO cortex do not display anchorage-independent growth.**

(A-C) The results of a colony formation assay characterizing the *Rp58* KO progenitor cells. Representative DIC images of colony-forming HeLa cells (A) and non-colony forming WT and *Rp58* KO cells (B, C). Scale bars: 50  $\mu$ m.
